# Supplementary material for: Solvent-Free Microwave-Assisted Extraction of Polyphenols from Olive Tree Leaves: Antioxidant and Antimicrobial Properties
Source: PubMed Central journal article supplement (PMC6152306; doi:10.3390/molecules22071056), 2017-06-24
Supplement: molecules-22-01056-s001.pdf [file molecules-22-01056-s001.pdf]

1 Article

2 **Solvent-free Microwave-assisted Extraction of Polyphenols**  
3 **from Olive Tree Leaves: Antioxidant and Antimicrobial**  
4 **Properties**

5 Selin Şahin<sup>1</sup>, Ruya Samli<sup>1</sup>, Ayşe Seher Birteksöz Tan<sup>2</sup>, Francisco J. Barba<sup>3</sup>, Farid Chemat<sup>4</sup>, Giancarlo  
6 Cravotto<sup>5\*</sup>, and José M. Lorenzo<sup>6</sup>

7 **SUPPORTING INFORMATION**

8

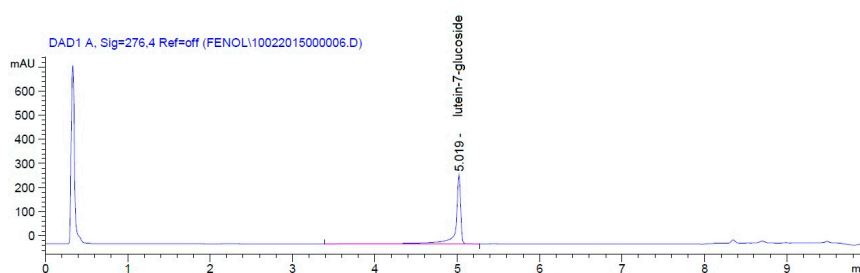

9

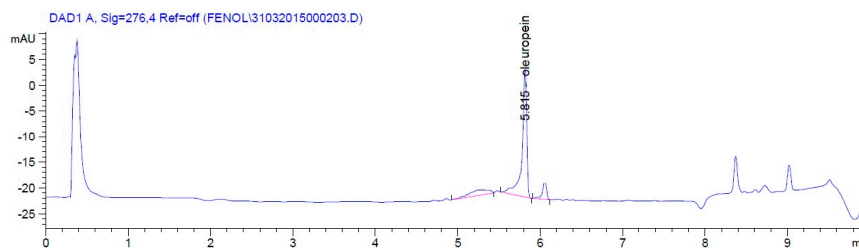

10

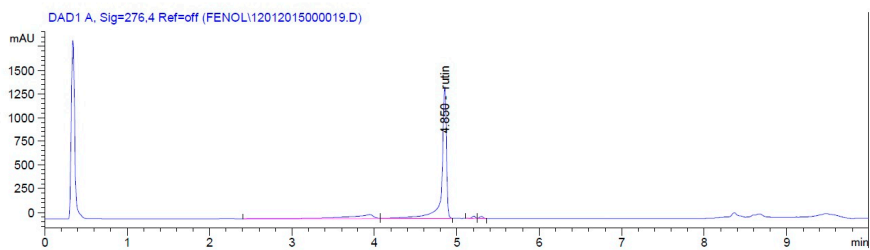

11

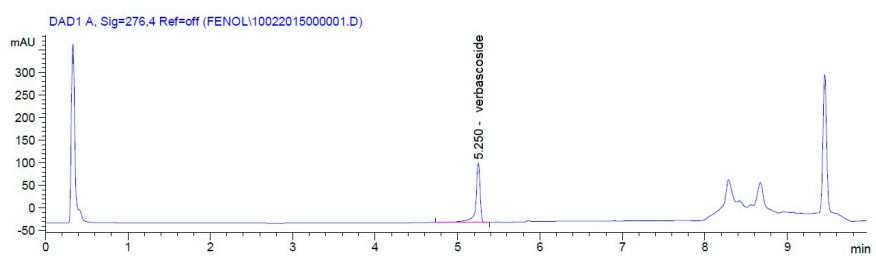

12
